# Supplementary material for: Sagittal spine disposition and pelvic tilt during outdoor fitness equipment use and their associations with kinanthropometry proportions in middle-aged and older adults
Source: PeerJ. 2021 Dec 20;9:e12657. doi: 10.7717/peerj.12657 (PMC8697770; doi:10.7717/peerj.12657)
Supplement: Supplemental Information 1 [file peerj-09-12657-s001.xlsx]

## Sheet: Database
Code	Age	Sex	Body mass	Height	BMI	Sitting height	Cormic index	Waist girth	Hip girth	Waist-hip ratio	Arm length	Forearm length	Upper limb length	Biacromial breadth	Biiliocristal breadth	Acromio-iliac index	Standing Thoracic curv	Standing Lumbar curv	Standing Pelvic tilt	SBR IP Thoracic curv	SBR IP Thoracic curv VS Standing Thoracic curv	SBR IP Lumbar curv	SBR IP Lumbar curv VS Standing Lumbar curv	SBR IP Pelvic tilt	SBR IP Pelvic tilt VS Standing Pelvic tilt	SBR FP Thoracic curv	SBR FP Thoracic curv VS Standing Thoracic curv	SBR FP Lumbar curv	SBR FP Lumbar curv VS Standing Lumbar curv	SBR FP Pelvic tilt	SBR FP Pelvic tilt VS Standing Pelvic tilt	Row IP Thoracic curv	Row IP Thoracic curv VS Standing Thoracic curv	Row IP Lumbar curv	Row IP Lumbar curv VS Standing Lumbar curv	Row IP Pelvic tilt	Row IP Pelvic tilt VS Standing Pelvic tilt	Row FP Thoracic curv	Row FP Thoracic curv VS Standing Thoracic curv	Row FP Lumbar curv	Row FP Lumbar curv VS Standing Lumbar curv	Row FP Pelvic tilt	Row FP Pelvic tilt VS Standing Pelvic tilt	BIke Thoracic curv	Bike Thoracic curv VS Standing Thoracic curv	Bike Lumbar curv	Bike Lumbar curv VS Standing Lumbar curv	BIke Pelvic tilt	BIke VS Standing Pelvic tilt
502	67	2	77.4	152.9	33.1075	80.4	52.5834	96.8	107.7	0.898793	31	21.8	52.8	33.9	30.6	0.9	56	-37.5	26	52.5	-3.5	0	37.5	16	-9.5	59.5	3.5	-26	11.5	19.5	-6	44	-12	5	42.5	11.5	-14	57	1	-5.5	32	13	-12.5	58	2	-5.5	32	17	-8.5
503	68	1	88.7	173.15	29.5855	91.0667	52.5941	99.7	109.698	0.908861	33.4	25.1	58.5	39.9	32.7	0.82	50.5	-33.5	22	51	0.5	2.5	36	5	-17.5	53	2.5	-16	17.5	5.5	-17	48.5	-2	-0.5	33	3	-19.5	57	6.5	1	34.5	-5.5	-28	49.5	-1	3	36.5	13	-9.5
504	66	2	75.6	151.899	32.7652	78.5333	51.701	111.2	105.6	1.05303	30.9997	22.4996	53.4992	36.4	31.1	0.85	54.5	-33.5	24	61.5	7	3.5	37	8	-15.5	62	7.5	-31	2.5	21	-2.5	50.5	-4	16.5	50	0	-23.5	64	9.5	-1	32.5	-7	-30.5	59.5	5	2	35.5	16	-7.5
505	79	2	88.7	152.45	38.1654	78.0333	51.1862	103.548	136.65	0.757762	29.8	22.4996	52.2996	35.2	32.7	0.93	48.5	-28.5	26	51.5	3	-11	17.5	16.5	-9	48.5	0	-26.5	2	13.5	-12	48	-0.5	-11.5	17	17.5	-8	54.5	6	-25	3.5	5.5	-20	42.5	-6	-5.5	23	8	-17.5
506	67	2	68.5	151.398	29.8847	79.4333	52.4664	102.849	109.25	0.941408	29.7499	22.4499	52.1998	36.45	34.55	0.95	58	-17	6	64	6	-23.5	-6.5	14.5	8.5	69.5	11.5	-12.5	4.5	5.5	-0.5	65	7	5.5	22.5	-6.5	-12.5	64.5	6.5	6.5	23.5	-11.5	-17.5	59	1	-17	0	15	9
507	65	2	60.6	147.3	27.9299	78.7667	53.4737	100.5	101.448	0.990655	28.5	22.3	50.8	36.3	30.15	0.83	56.5	-26	14	37	-19.5	9	35	17.5	3.5	50.5	-6	2.5	28.5	6.5	-7.5	52	-4.5	11.5	37.5	6.5	-7.5	52	-4.5	13.5	39.5	-3.5	-17.5	52.5	-4	-23.5	2.5	32.5	18.5
508	75	2	88.4	153.55	37.4933	80.8	52.6213	105.998	127.397	0.832025	28	24.6	52.6	38.55	35	0.91	44.5	-31.5	18	39.5	-5	-15.5	16	27	9	54.5	10	-22.5	9	17.5	-0.5	38	-6.5	-16.5	15	18.5	0.5	68.5	24	-53	-21.5	3	-15	45	0.5	-16	15.5	26.5	8.5
509	57	2	59.1	161.9	22.5473	88.1	54.4163	81.5	97.0487	0.839784	30.0499	21.5499	51.5998	35.95	27.5	0.76	42	-24	14	43	1	2	26	5.5	-8	42.5	0.5	-1.5	22.5	4	-9.5	43.5	1.5	23	47	-7.5	-21	38	-4	15	39	-16.5	-30	34.5	-7.5	15	39	11	-2.5
510	80	2	68	140.5	34.4474	75.5	53.7367	98.3	112.5	0.873778	25.1	22.1	47.2	33.4	33	0.99																												22	22	2	2	19.5	19.5
511	52	2	75	164.05	27.8682	85.6667	52.2199	85.5	107.8	0.793135	31.8	24.3	56.1	37.6	31.7	0.84	47	-42.5	32	42	-5	8	50.5	3	-28.5	46	-1	-13	29.5	5.5	-26	42	-5	9.5	52	-1	-32.5	54.5	7.5	-11.5	31	-11.5	-43	41	-6	-5	37.5	17	-14.5
512	69	2	67.4	153.55	28.5865	80.4333	52.3825	99.2	102.5	0.967806	31	21.9	52.9	36.3	28.6	0.79	39	-28.5	23	46.5	7.5	-2.5	26	6.5	-16.5	53	14	3.5	32	-6.5	-29.5	51.5	12.5	11.5	40	-3	-26	60.5	21.5	4	32.5	-9.5	-32.5	37	-2	7.5	36	2	-21
513	61	2	105.8	158.2	42.2739	80.3667	50.8007	115	126.7	0.907656	32.3	25.2996	57.5996	38.05	34.4	0.9	85	-52.5	22	71.5	-13.5	-1	51.5	6.5	-15	62.5	-22.5	7.5	60	-17.5	-39	66.5	-18.5	11.5	64	-4.5	-26	78.5	-6.5	-9.5	43	-4	-25.5	74	-11	11.5	64	5	-16.5
514	69	2	71.7	154.646	29.9806	81.4333	52.6578	101.8	109.2	0.932234	32.1493	22.3	54.4493	36.9	28.7	0.78	52.5	-28	20	40.5	-12	-15	13	19	-1	64.5	12	-37.5	-9.5	12.5	-7.5	17.5	-35	-13	15	9.5	-10.5	58.5	6	-15.5	12.5	-6	-26	57.5	5	-26.5	1.5	29	9
515	63	2	60.9	149.1	27.3944	75.5333	50.6595	84.7	101.999	0.830399	29.6	20.8499	50.4499	37.1	30.7	0.83	52	-30.5	20	23	-29	20.5	51	7.5	-12	39	-13	2.5	33	8.5	-11	34.5	-17.5	20.5	51	5.5	-14	48.5	-3.5	1	31.5	-5.5	-25	34	-18	8.5	39	18.5	-1
516	60	2	70.2	158.549	27.926	83.3	52.5389	94.3	107.7	0.875583	30.4	23.1	53.5	36	30.9	0.86	46	-28.5	18	38	-8	-3.5	25	8.5	-9.5	59	13	-27	1.5	8.5	-9.5	50.5	4.5	5.5	34	3	-15	59	13	-6	22.5	-6	-24	38.5	-7.5	-15.5	13	22	4
517	65	2	59	152.5	25.3695	79.5	52.1311	87.4493	97	0.901539	30.6493	21.7995	52.4488	35.55	30.55	0.86	45.5	-23	20	54	8.5	2	25	5	-15.5	55.5	10	-6.5	16.5	-2	-22.5	44	-1.5	23	46	-7	-27.5	53.5	8	15.5	38.5	-15	-35.5	49.5	4	10.5	33.5	6	-14.5
518	66	2	67.6	154.35	28.3749	83.1667	53.8819	83.9	104.598	0.802122	29.9	21.2	51.1	34.85	28.5	0.82	47.5	-45.5	30	35.5	-12	-5.5	40	17.5	-13	46.5	-1	-28	17.5	17.5	-13	44	-3.5	2	47.5	5	-25.5	49	1.5	-4	41.5	-3.5	-34	34	-13.5	-7.5	38	28	-2.5
519	59	2	84.4	181.799	25.5364	90.6333	49.8536	92.5983	104	0.890368	36.3	27.5996	63.8996	39.5	34.3	0.87	61	-54	32	40	-21	12.5	66.5	-5	-37.5	44.5	-16.5	-8.5	45.5	3.5	-29	45.5	-15.5	14	68	-5.5	-38	54.5	-6.5	7	61	-25.5	-58	46.5	-14.5	-7.5	46.5	17	-15.5
520	68	1	84.1	170.55	28.913	87.3667	51.2264	103.848	104.149	0.997107	33.2	24.9996	58.1996	36.9	33.7	0.91	65.5	-43	26	66	0.5	-9	34	7	-18.5	69	3.5	-8	35	6	-19.5	72.5	7	-1.5	41.5	-0.5	-26	73.5	8	1	44	-1.5	-27	75	9.5	9.5	52.5	-5	-30.5
521	69	1	91	176.85	29.0959	90.0333	50.9095	109.7	102.749	1.06764	37.2	27.1	64.3	40.05	32.85	0.82	79	-36	14	63.5	-15.5	2	38	3	-11.5	69.5	-9.5	8.5	44.5	-16.5	-31	52.5	-26.5	11	47	-1	-15.5	57.5	-21.5	4.5	40.5	-10	-24.5	55.5	-23.5	8	44	-1.5	-16
522	52	2	72.3	153.3	30.7648	81.9667	53.4682	105.198	97.3	1.08117	31.4493	21.6	53.0493	36.75	31.4	0.85	55.5	-32.5	20	56	0.5	-4.5	28	16.5	-3.5	58.5	3	-20	12.5	8.5	-11.5	37.5	-18	2.5	35	5	-15	55.5	0	-11.5	21	1	-19	55.5	0	-7	25.5	20.5	0.5
523	50	2	93.5	172.9	31.2768	88.3	51.0701	100.449	113.05	0.888536	33.9493	27.6	61.5493	40.45	33.25	0.82	53	-37.5	24	49.5	-3.5	1	38.5	2.5	-21	51.5	-1.5	-13	24.5	8	-15.5	52.5	-0.5	9.5	47	-0.5	-24	59.5	6.5	5	42.5	-9.5	-33	52	-1	2	39.5	3	-20.5
524	68	2	65.2	155.1	27.1035	80.3	51.7731	84.7989	99	0.856555	31.0493	22.5	53.5493	37.8	30.95	0.82	37.5	-23	24	33.5	-4	9.5	32.5	4	-19.5	30.5	-7	-8.5	14.5	9	-14.5	49	11.5	15.5	38.5	2.5	-21	35	-2.5	6	29	-4.5	-28	29.5	-8	5.5	28.5	11	-12.5
525	64	1	125.3	170.15	43.28	87.7667	51.5819	132	135	0.97778	33.8493	26.1	59.9493	43.3	38.5	0.89	56.5	-19	11	58.5	2	-7	12	7	-4	62	5.5	-17.5	1.5	1.5	-9.5	46	-10.5	5.5	24.5	1.5	-9.5	63	6.5	-9	10	-10.5	-21.5	63	6.5	-4	15	9.5	-1.5
526	72	1	76.4	160.3	29.7322	81.8	51.0294	99.6498	99.9999	0.996499	33.7493	25.4	59.1493	41.05	30	0.73	50.5	-19.5	18	51.5	1	11	30.5	-0.5	-18.5	49	-1.5	-4.5	15	12	-6	51.5	1	-1.5	18	5	-13	52	1.5	-1.5	18	2	-16	55.5	5	3.5	23	14	-4
527	64	2	69.7	157	28.2771	81.8833	52.1551	94.5	98.5999	0.958419	32.3499	24.0499	56.3998	36.9	32.1	0.87
528	60	2	83.3	169.397	29.0291	90.0333	53.1493	89.6	112.3	0.797863	34.3	25.5	59.8	37.6	31.6	0.84	56	-48.5	30	53.5	-2.5	-10	38.5	7	-23	69	13	-20.5	28	6.5	-23.5	52.5	-3.5	-4.5	44	10	-20	76.5	20.5	-18	30.5	-7.5	-37.5	72	16	-19	29.5	18.5	-11.5
529	68	1	65.9	160.05	25.7261	78.5333	49.068	89.8	91.5999	0.980351	33.3	26.1	59.4	35.7	29.5	0.83	41	-18.5	14	33	-8	5.5	24	14	-0.5	41	0	3.5	22	5.5	-9	38.5	-2.5	12	30.5	-1	-15.5	45.5	4.5	11	29.5	-9	-23.5	37	-4	-2.5	16	23.5	9
530	68	2	66.4	153.1	28.3281	80.6	52.6454	87.6	104.848	0.835495	32.0499	22.6	54.6499	36.65	31.3	0.85	62	-34	20	46	-16	-21.5	12.5	23.5	3.5	53	-9	-31	3	21	1	55	-7	-0.5	33.5	-2.5	-22.5	57.5	-4.5	-3.5	30.5	-7.5	-27.5	44	-18	-20	14	23.5	3.5
531	59	2	61	149.55	27.2747	77.5667	51.8669	87.0982	93.199	0.934539	29.4	21.5	50.9	36.4	28.6	0.79	49	-32	27	45	-4	16.5	48.5	0	-27	47	-2	-2.5	29.5	7	-20	38.5	-10.5	11	43	-2.5	-29.5	-1.5	-50.5	8	40	-9	-36	39.5	-9.5	-1.5	30.5	18.5	-8.5
532	55	2	66.7	148.15	30.3896	78.2	52.7845	96.5	101.65	0.949338	30.1499	22.1499	52.2998	36.7	28.65	0.78	66	-48	28	63.5	-2.5	-3.5	44.5	11	-16.5	74.5	8.5	-36	12	22.5	-5	66.5	0.5	1	49	10.5	-17	67.5	1.5	0	48	-18.5	-46	80.5	14.5	-22.5	25.5	18.5	-9
533	55	2	66.9	159.6	26.264	85.6333	53.655	80.6485	99.348	0.811778	32.2	23.6996	55.8996	37.15	29.3	0.79	37	-46	35	53.5	16.5	-29.5	16.5	27.5	-7.5	55	18	-32.5	13.5	19	-16	48.5	11.5	-7	39	3.5	-31.5	52.5	15.5	-24	22	0	-35	58.5	21.5	-21.5	24.5	21	-14
534	63	2	56.5	150	25.1111	78.9667	52.6445	86.1	97.7487	0.88083	29.4	21.3	50.7	35.05	30.5	0.87	46.5	-32.5	24	53.5	7	-15.5	17	14.5	-9	56.5	10	-29	3.5	18.5	-5	47.5	1	2.5	35	4.5	-19	57	10.5	-11.5	21	-5	-28.5	52.5	6	-21	11.5	24	0.5
535	64	1	85.2	170.2	29.4118	87.3333	51.3123	107.748	96.2983	1.1189	33.8493	26.1	59.9493	39.45	30.5	0.77	44	-29.5	21	38.5	-5.5	9	38.5	11	-10	40	-4	6	35.5	12.5	-8.5	41.5	-2.5	13	42.5	-6.5	-27.5	44.5	0.5	16	45.5	-5.5	-26.5	39.5	-4.5	9	38.5	8	-13
536	62	1	84.5	170.05	29.2216	84.6	49.7501	99.2	101	0.982179	33.9	27.3	61.2	40.1	30.2	0.75	42	-32.5	22	23.5	-18.5	-9.5	23	13.5	-8.5	30	-12	-23	9.5	21	-1	31	-11	4	36.5	3	-19	28.5	-13.5	-4	28.5	5	-17	28.5	-13.5	-2	30.5	14.5	-7.5
537	51	1	81	168.55	28.512	86.8	51.4981	100.1	98.7488	1.01368	33.8	24.7	58.5	39.9	30.15	0.76	59	-24.5	11	51.5	-7.5	11	35.5	-1	-12	53.5	-5.5	11.5	36	-11	-22	47.5	-11.5	15.5	40	-7	-18	51.5	-7.5	18.5	43	-15.5	-26.5	56.5	-2.5	12.5	37	-4.5	-15.5
538	56	2	104.7	162.899	39.4555	87.2667	53.5709	109.1	134.548	0.810865	30.3499	22.4	52.7499	38.25	39.3	1.03	45	-36.5	32	44	-1	-9	27.5	17	-14.5	39.5	-5.5	-23.5	13	26.5	-5	46	1	0.5	37	9.5	-22	52.5	7.5	-18.5	18	2.5	-29	50.5	5.5	-7	29.5	23.5	-8
539	70	2	63.1	157.85	25.3245	82.9667	52.5605	91.8	95.7	0.959248	31.8	22.4996	54.2996	35.7	30.6	0.86	53.5	-24	12	56	2.5	0.5	24.5	6	-6.5	46	-7.5	-3.5	20.5	-6.5	-19	44	-9.5	12.5	36.5	0.5	-12	48.5	-5	6	30	-10.5	-23	58.5	5	-13.5	10.5	20.5	8
540	76	2	65.9	162.4	24.987	83.2667	51.2726	84.4	98.3999	0.857724	32.8	23.1	55.9	36.2	30.65	0.85
541	72	2	85.7	155.75	35.3285	78.9667	50.7009	105.3	113.2	0.930211	31	22.6	53.6	37.3	32.8	0.88
542	60	2	63.6	156.699	25.9013	82.5333	52.6698	77.8	101.098	0.769547	31.6	23.2996	54.8996	37.1	31.75	0.86	48.5	-37	26	36	-12.5	-14	23	18.5	-8	37	-11.5	-19.5	17.5	15.5	-11	39	-9.5	-3	34	2	-24.5	50.5	2	-15.5	21.5	6	-20.5	33	-15.5	-15.5	21.5	24.5	-2
543	62	2	65.2	159.05	25.7739	80.7667	50.7807	83.2	100.048	0.831601	31.6	25.1	56.7	37.4	30.1	0.8	66.5	-25.5	10	59.5	-7	-11	14.5	8	-2.5	58	-8.5	-16	9.5	6.5	-4	62.5	-4	3	28.5	-3	-13.5	58.5	-8	-1	24.5	-6.5	-17	49	-17.5	6	31.5	4	-6.5
544	53	2	84.3	160.45	32.7453	83	51.7296	98.4	110.149	0.893332	32.8	24.1	56.9	38.7	32	0.83
545	52	1	100.8	189.4	28.0996	96.1	50.7392	106.35	105.5	1.00805	38.8	29.8	68.6	40.7	32.95	0.81	56.5	-27	11	59.5	3	-3.5	23.5	-3	-14	48	-8.5	3	30	1	-10	52	-4.5	16	43	-15	-26	48	-8.5	13	40	-11.5	-22.5	54	-2.5	-3	24	7.5	-3.5
546	65	2	68.4	154.65	28.5994	81.0667	52.4194	89.6	101.25	0.88494	31.4493	23.1	54.5493	37.8	29.7	0.79	32	-24.5	20	35	3	2.5	27	4.5	-15	31	-1	-3	21.5	12	-7.5	36.5	4.5	6.5	31	4.5	-15	38.5	6.5	-1.5	23	4.5	-15	37	5	-3	21.5	18	-1.5
547	67	2	60.1	149.25	26.9804	84.0333	56.3039	76.6492	105.7	0.725158	28.1	21.4	49.5	35.65	29.9	0.84	36.5	-18	14	36	-0.5	-6.5	11.5	23	9	41.5	5	-22.5	-4.5	19	5	43	6.5	10	28	4.5	-9.5	52	15.5	-31	-13	13	-1	32	-4.5	2.5	20.5	18.5	4.5
548	79	1	71.3	169.85	24.7149	87.3667	51.4375	90.1999	91.3493	0.987417	35.6	26.4996	62.0996	41.3	29.85	0.72	53.5	-22	9	53	-0.5	-0.5	21.5	-1	-10	57.5	4	-2.5	19.5	-12.5	-21.5	48.5	-5	7	29	-16	-25	28	-25.5	31	53	-32.5	-41.5	48	-5.5	12.5	34.5	-7	-16
549	76	2	54.2	147.5	24.9124	77.5667	52.5876	82.2989	93.2996	0.882093	31.2	22.2	53.4	33.4	28.6	0.86	58.5	-42	28	58	-0.5	-17.5	24.5	20	-7.5	62.5	4	-15	27	16.5	-11	64	5.5	-4	38	3	-24.5	59.5	1	-5.5	36.5	5	-22.5	56	-2.5	-22	20	28	0.5
550	70	2	75.2	143.75	36.3919	72.1667	50.2031	110.599	118.648	0.93216	30.4	21.6499	52.0499	36	32.5	0.9	57	-37	32	66.5	9.5	-12.5	24.5	19.5	-12.5	65	8	-30.5	6.5	27.5	-4.5	58	1	-11.5	25.5	17.5	-14.5	69	12	-31.5	5.5	7.5	-24.5	63	6	-10	27	22.5	-9.5
551	68	2	70.1	148.399	31.8313	79.1333	53.3246	92.3	106.749	0.864646	30.5493	22.5996	53.1488	36.7	29.3	0.8	47	-33.5	28	51.5	4.5	1.5	35	8	-20	61	14	-16.5	17	8	-20	47.5	0.5	7.5	41	4	-24	52	5	-2	31.5	-1.5	-29.5	50	3	-13	20.5	19.5	-8.5
552	51	2	76.5	155.35	31.6986	86.5	55.6808	82.6	110.65	0.746498	29.1	23.1	52.2	37	30	0.81	38	-18.5	14	32.5	-5.5	-1	17.5	16	2	47.5	9.5	-22	-3.5	12	-2	43.5	5.5	3.5	22	4	-10	46	8	-6.5	12	-4	-18	35	-3	-13.5	5	26.5	12.5
553	52	2	69.4	159.25	27.3653	85.5	53.6892	83.2	107.7	0.772517	31.4997	22.6499	54.1496	36.1	32.3	0.89	32.5	-39	34	23	-9.5	-11	28	35.5	1.5	42.5	10	-32	7	27.5	-6.5	22.5	-10	2	41	18	-16	32	-0.5	-3.5	35.5	8.5	-25.5	23	-9.5	-15.5	23.5	35.5	1.5
554	74	2	74.1	156.1	30.4097	80.0667	51.2919	96.3	103.9	0.926853	30.7	22.2	52.9	37.9	30.3	0.8	57	-26.5	14	48	-9	3.5	30	5.5	-8.5	59.5	2.5	-11.5	15	9.5	-4.5	45	-12	10.5	37	1	-13	58	1	4	30.5	-1	-15	42	-15	3.5	30	16	2
555	75	2	81.6	150.849	35.8598	76.1	50.4479	115.2	118.4	0.972973	31.8	22.9996	54.7996	36.2	33.2	0.92	70.5	-45	22	65	-5.5	4	49	7.5	-14	82.5	12	-40.5	4.5	18	-3.5	69.5	-1	-10.5	34.5	10.5	-11	87.5	17	-33	12	0.5	-21	78.5	8	-11	34	10.5	-11
556	50	2	71.6	167.2	25.6118	90.2	53.9474	80.4	105.4	0.762808	32.8	24.2	57	36.1	30.8	0.85	48	-38.5	28	41	-7	-14.5	24	20.5	-7.5	47	-1	-38.5	0	24	-4	41	-7	-2	36.5	13	-15	26	-22	-10	28.5	2.5	-25.5	44.5	-3.5	-21.5	17	28	0
557	51	1	92.8	174.55	30.4585	92.1333	52.7834	105	105.35	0.996678	33.5	25	58.5	40.1	31.3	0.78	40	-31.5	26	33	-7	12.5	44	-3.5	-30	34.5	-5.5	-7.5	24	7.5	-19	41	1	13.5	45	-9	-35.5	44	4	6	37.5	-9.5	-36	30	-10	5.5	37	13.5	-13
558	71	1	98.8	174	32.6331	92.5667	53.1992	112.55	104.15	1.08065	35.5499	26.5	62.0499	37.1	31.4	0.85	44	-39.5	24	49	5	-7	32.5	9	-14.5	53	9	-8	31.5	3	-20.5	55.5	11.5	0.5	40	0.5	-23	69.5	25.5	-10	29.5	-10.5	-34	52	8	9	48.5	0.5	-23
559	73	2	68.3	157	27.709	81	51.5924	87.8	110.349	0.795654	32.1493	24.4	56.5493	35.1	32.2	0.92	58.5	-34	24	43.5	-15	-19.5	14.5	28.5	5	51.5	-7	-38.5	-4.5	31	7.5	45.5	-13	-15.5	18.5	22.5	-1	46.5	-12	-28.5	5.5	18.5	-5	37	-21.5	-12.5	21.5	29	5.5
560	57	2	87.7	163.949	32.6273	86.1667	52.5569	102.4	116.65	0.87784	33.2997	23.9	57.1997	36.5	30.6	0.84	45	-37.5	30	58.5	13.5	-23	14.5	24.5	-5	57.5	12.5	-31.5	6	27	-2.5	52	7	-4	33.5	14.5	-15	67	22	-26.5	11	12.5	-17	62	17	-11	26.5	17	-12.5
561	50	2	90.6	155.15	37.6378	83.2667	53.6685	106.5	118.3	0.900254	30.8499	22.4	53.2499	37.65	30.25	0.8	62	-37	27	45.5	-16.5	-4	33	18	-9	65.5	3.5	-30.5	6.5	17.5	-9.5	68.5	6.5	-19.5	17.5	24	-3	67.5	5.5	-14.5	22.5	8	-19	76.5	14.5	-23	14	25	-2
562	66	2	58.3	145.7	27.4631	75.4	51.7502	93.4	92.55	1.00918	30.6493	21.5499	52.1991	34.1	28.5	0.84	34	-23.5	14	24	-10	0	23.5	15.5	1	49.5	15.5	-26.5	-3	9.5	-5	30	-4	6	29.5	7.5	-7	37	3	-7.5	16	6	-8.5	34.5	0.5	-12.5	11	16.5	2
563	51	2	65.3	153.9	27.57	85.3	55.4256	75.8	102.398	0.740246	29.1	23.7	52.8	36.6	27.9	0.76	49	-32.5	20	49.5	0.5	-14.5	18	18.5	-2	55	6	-4	28.5	-1.5	-22	53.5	4.5	-5	27.5	9.5	-11	54	5	-8	24.5	7.5	-13	51.5	2.5	-5	27.5	15.5	-5
564	55	2	66.4	143.95	32.0439	75.5	52.4488	94.0493	96.8996	0.970586	29.4	21.3499	50.7499	35.6	29	0.81	50	-21	13	42.5	-7.5	16.5	37.5	4.5	-8.5	46.5	-3.5	-7	14	12	-1	41	-9	13	34	3.5	-9.5	49.5	-0.5	16	37	-8.5	-21.5	41	-9	-0.5	20.5	15.5	2.5
565	58	2	68	151	29.8233	83	54.9669	91.0982	95.0991	0.95793	29.5997	22.1	51.6997	34.85	29.55	0.85	41	-4	6	38	-3	10.5	14.5	6	0.5	44.5	3.5	2.5	6.5	7.5	2	51.5	10.5	12.5	16.5	0	-5.5	46	5	16.5	20.5	-16.5	-22	37.5	-3.5	-13.5	-9.5	19.5	14
566	50	2	62.5	153	26.6991	83.0667	54.2919	83.1999	100.8	0.825396	28.3	21.2995	49.5995	35.5	29.1	0.82	41	-34	26	39	-2	-2.5	31.5	17	-9	38	-3	-14	20	16.5	-9.5	42	1	12	46	4	-22	49.5	8.5	-2.5	31.5	-17	-43	34	-7	0	34	22.5	-3.5
567	56	2	66.1	160.4	25.6917	87.4	54.4888	78.25	98.1479	0.797266	31.4997	23.8499	55.3496	37.75	27.6	0.73	43	-37.5	24	50	7	0	37.5	6	-18	57.5	14.5	-27	10.5	9	-15	51	8	8.5	46	0.5	-23.5	53.5	10.5	-4.5	33	-1.5	-25.5	52.5	9.5	0	37.5	3	-21
568	60	1	83.8	173	27.9996	93.1667	53.8536	90.05	103.25	0.872155	34.5	26	60.5	39.25	30.55	0.78	35	-37	29	54.5	19.5	-7.5	29.5	12.5	-16.5	50	15	10	47	-0.5	-29.5	56.5	21.5	5	42	-4	-33	57	22	12	49	-15	-44	41	6	-3.5	33.5	23	-6
569	66	2	56.4	151.5	24.5728	76.5667	50.5391	76.5999	92.899	0.82455	29.8	21.2499	51.0499	36.7	29.8	0.81	35	-25.5	13	33	-2	10.5	36	11.5	-1.5	43	8	13	38.5	-6.5	-19.5	35	0	15	40.5	2	-11	43	8	11	36.5	-20	-33	42.5	7.5	12.5	38	10	-3
570	65	2	74.4	153.15	31.7204	78	50.9305	92.1	106.3	0.866419	31.9499	26.0996	58.0495	37.55	28.9	0.77	41.5	-32.5	28	40.5	-1	2.5	35	9.5	-18	56	14.5	-22	10.5	17	-10.5	43	1.5	9	41.5	1.5	-26	53	11.5	-10	22.5	1.5	-26	53.5	12	-10.5	22	13.5	-14
571	63	2	60.6	156	24.9014	82.8	53.0769	79.5995	100.15	0.794805	31.1	23	54.1	35.8	30.25	0.84	51	-27.5	12	53.5	2.5	5	32.5	7	-4.5	47.5	-3.5	-6.5	21	5	-6.5	53.5	2.5	9	36.5	-0.5	-12	45	-6	-1	26.5	0	-11.5	53	2	4.5	32	13.5	2
[truncated: 12 more columns]
